# Supplementary material for: Capillary forces exerted by a water bridge on cellulose nanocrystals: the effect of an external electric field
Source: Royal Society of Chemistry journal article supplement (doi:10.1039/d2cp05563e), 2023-01-01
Supplement: d2cp05563e1.xlsx [file d2cp05563e1.xlsx]

## Sheet: Sheet1
			Dependence of capillary force on direction and magnitude of electric field strength(equation 4)
Field direction	Electric field (V/nm)	theta (degrees)	gamma (mN/m)	lx (nm)	ly (nm)	d (nm)	sin(theta)	cos(theta)	F/1000	Error/1000
	0	42.8	67.5	6.96	5.65	3.34	0.679	0.7337	902.081	57.533
PARALLEL	0.25	27.74	74.5	6.96	5.7	3.34	0.4565	0.885	1019.84	77.21
	0.5	16.21	81.2	6.96	5.77	3.34	0.279	0.96024	1095.18	45.63
	0.75	10.71	85.5	6.96	6.15	3.34	0.185	0.9825	1186.65	51.36
		4.67	3.5	0	0.15	0
		3.42	4.1	0	0.09	0
ERRORs		2.9	3.2	0	0.13	0
		2.54	3.7	0	0.18	0
	V	theta	gamma	lx	ly	d	sin(theta)	cos(theta)	F/1000	Error/1000
	0	42.8	67.5	6.96	5.65	3.34	0.679	0.7337	902.081	57.533
PERPENDICULAR	0.25	45.095	60.37	6.96	5.67	3.34	0.7082	0.7059	801.08	61.89
	0.5	49.8	56.66	6.96	5.67	3.34	0.7637	0.6454	733.235	70.83
	0.75	58.7	48.91	6.96	5.85	3.34	0.7059	0.5195	550.041	57.28
		4.67	3.5	0	0.15	0
		3.14	4.7	0	0.09	0
		2.82	5.5	0	0.13	0
		3.14	4.5	0	0.18	0
			Dependence of capillary force on height of the cellulose channels (equation 4)
		theta		lx	ly	d	sin(theta)	cos(theta)	F/1000	Error/1000
HEIGHT	3	42.8	67.5	6.96	8.6	1.38	0.679	0.7337	2467.08	180
(CALCULATE)	5	42.8	67.5	6.96	7.7	2.34	0.679	0.7337	1453.24	93.57
	7	42.8	67.5	6.96	5.65	3.27	0.679	0.7337	914.563	50
	9	42.8	67.5	6.96	5.3	4.3	0.679	0.7337	743.847	40
		4.67	3.5	0	0.2	0
		4.67	3.5	0	0.22	0
		4.67	3.5	0	0.15	0
		4.67	3.5	0	0.19	0
